# Supplementary material for: Immunity Improvement and Gut Microbiota Remodeling of Mice by Wheat Germ Globulin
Source: Research Square preprint supplement (doi:10.21203/rs.3.rs-180275/v1), 2021-02-01
Supplement: Supplementary file 1 [file 2b16c225a2b02e6a2bc840cc.docx]

**Graphical Abstracts**

**
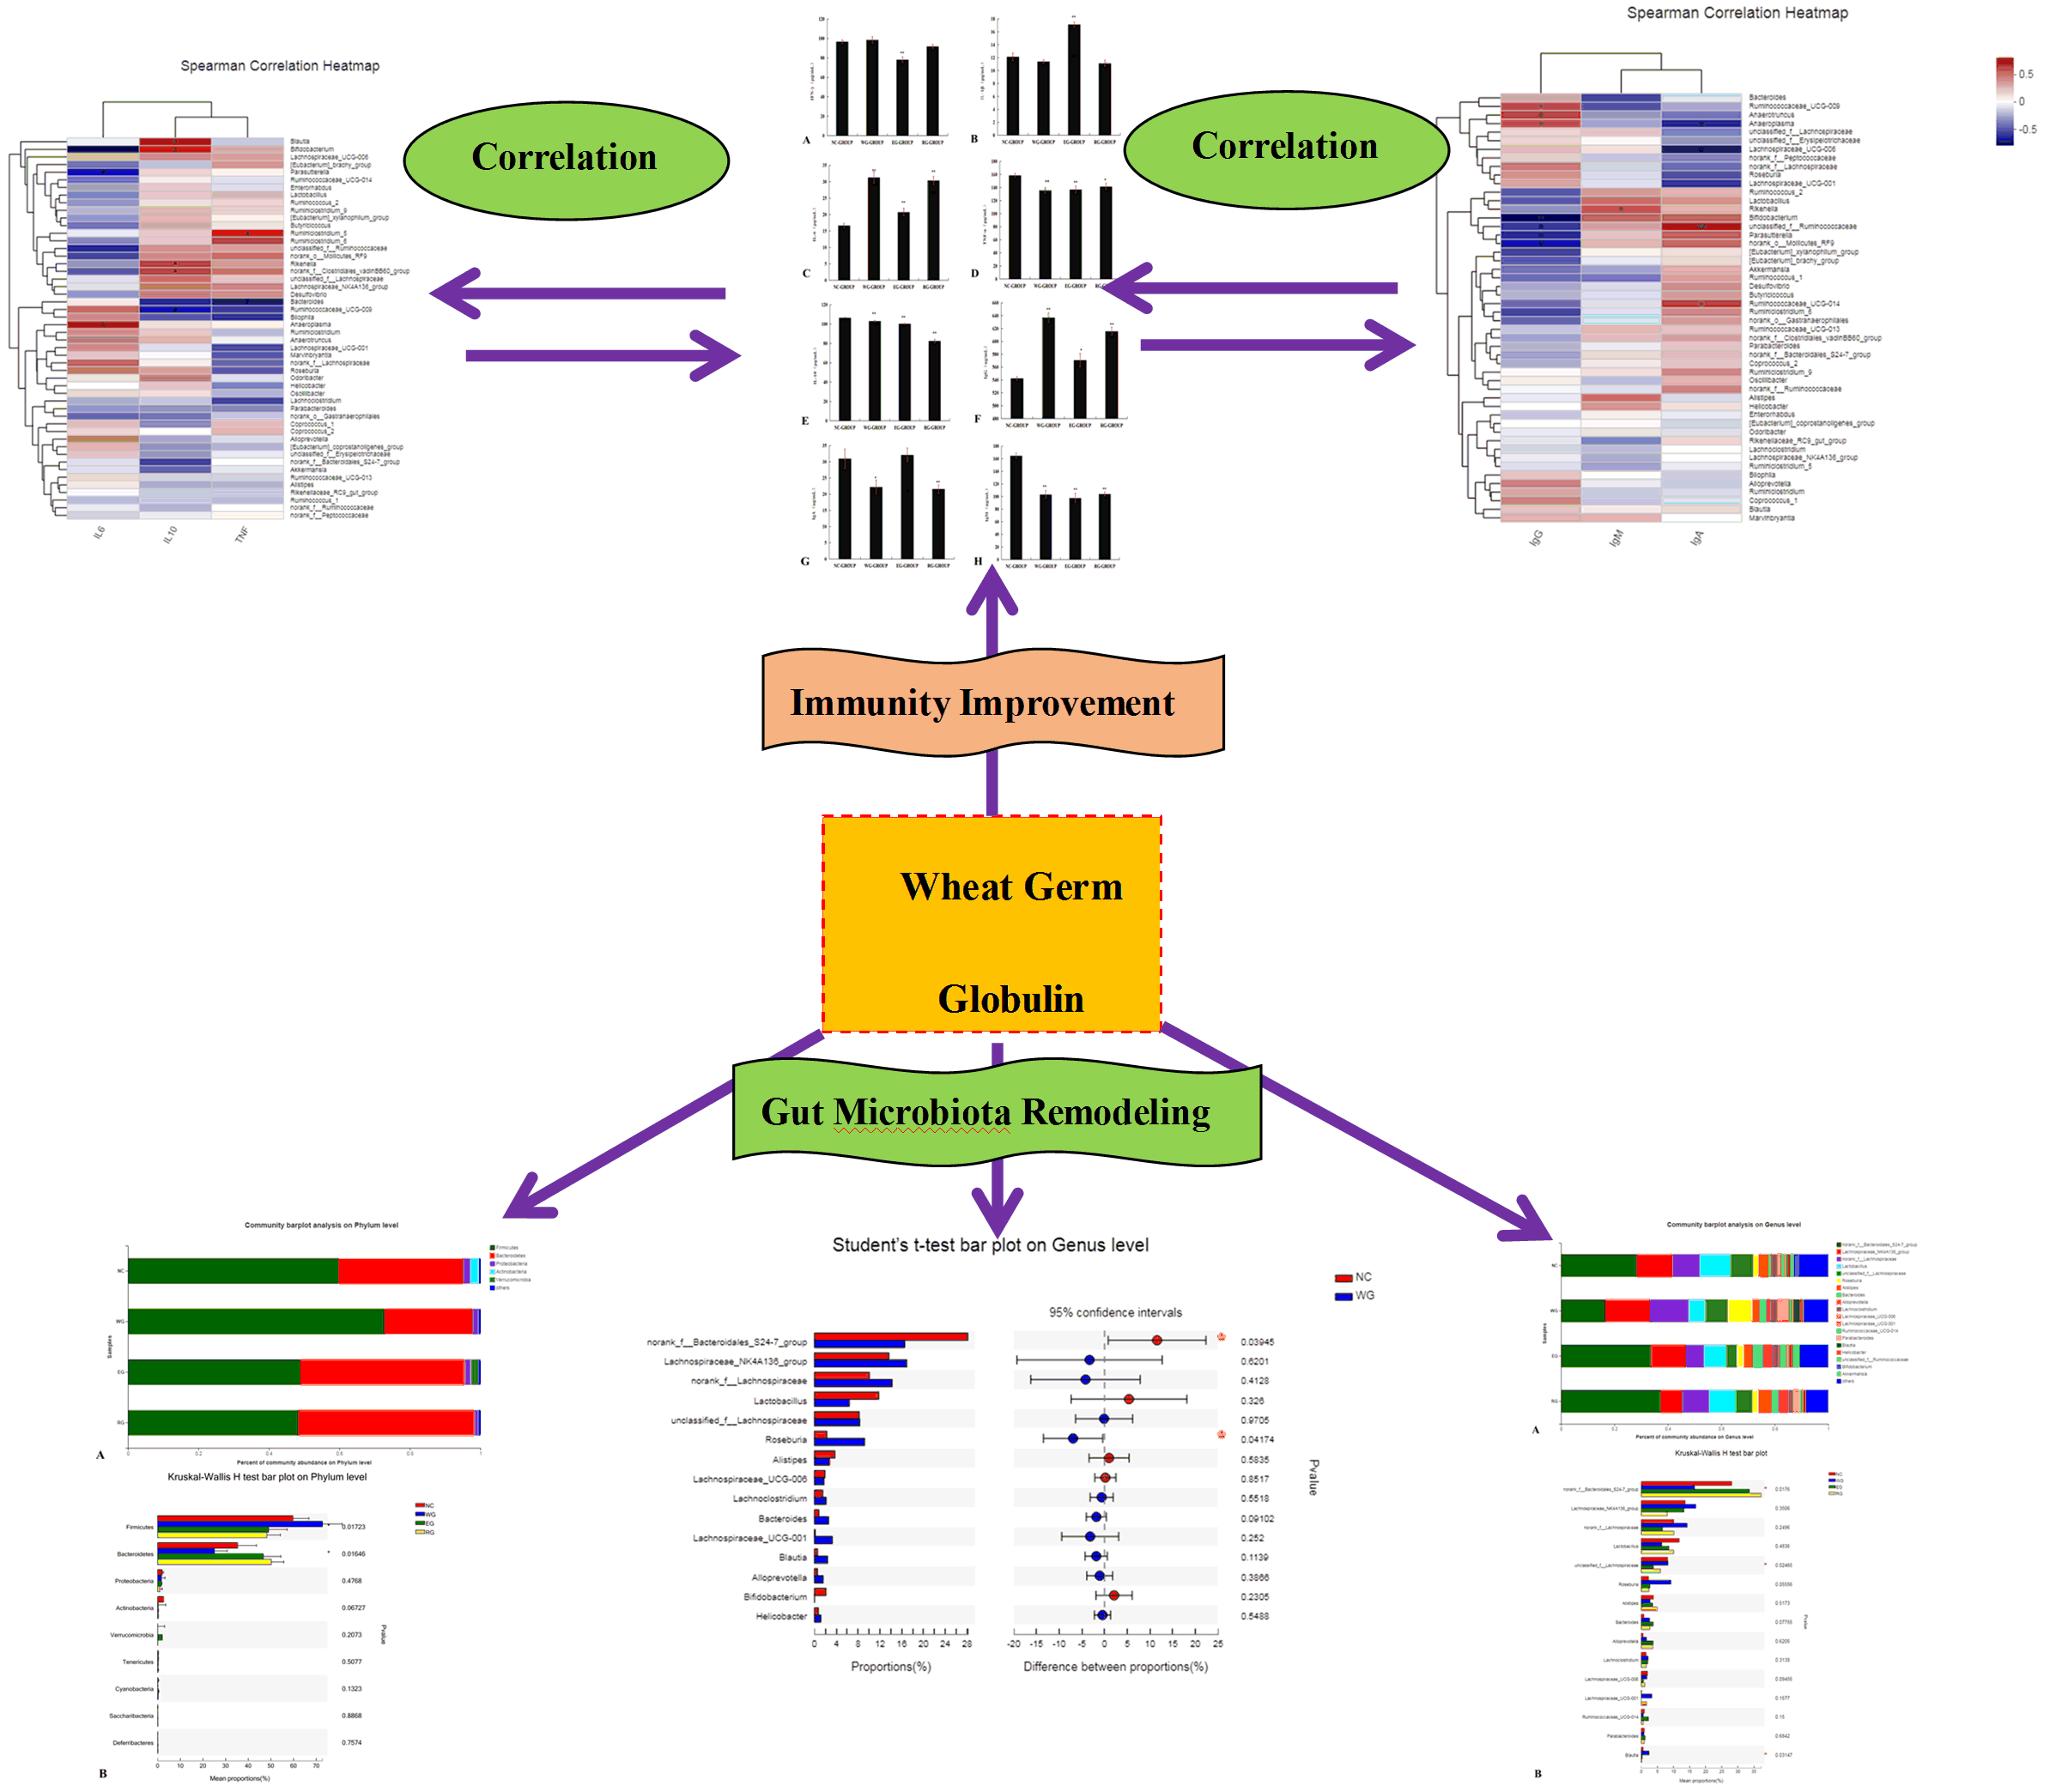
**

**Immunity Improvement and****Gut Microbiota Remodeling of Mice by** **Wheat Germ Globulin**
